1 **Neural dynamics between anterior insular cortex and right supramarginal gyrus dissociate genuine**  
2 **affect sharing from automatic responses to pretended pain**

3 Yili Zhao<sup>1</sup>, Lei Zhang<sup>1</sup>, Markus Rütgen<sup>1,2</sup>, Ronald Sladky<sup>1</sup>, Claus Lamm<sup>1,2\*</sup>

4 <sup>1</sup> Social, Cognitive and Affective Neuroscience Unit, Department of Cognition, Emotion, and Methods  
5 in Psychology, Faculty of Psychology, University of Vienna, Liebiggasse 5, 1010 Vienna, Austria

6 <sup>2</sup>Vienna Cognitive Science Hub, University of Vienna, Liebiggasse 5, 1010 Vienna, Austria

7

8 **Abstract**

9 Empathy for pain engages both shared affective responses and self-other distinction. In this study,  
10 we addressed the highly debated question of whether neural responses previously linked to affect  
11 sharing could result from the perception of salient affective displays. Moreover, we investigated how  
12 affect sharing and self-other distinction interact to determine our response to a pain that is either  
13 perceived as genuine or pretended (while in fact both were acted for reasons of experimental  
14 control). We found stronger activations in regions associated with affect sharing (anterior insula,  
15 aIns, and anterior mid-cingulate cortex, aMCC) as well as with affective self-other distinction (right  
16 supramarginal gyrus, rSMG), in participants watching video clips of genuine vs. pretended facial  
17 expressions of pain. Using dynamic causal modeling (DCM), we then assessed the neural dynamics  
18 between the right aIns and rSMG in these two conditions. This revealed a reduced inhibitory effect  
19 on the aIns to rSMG connection for genuine compared to pretended pain. For genuine pain only,  
20 brain-to-behavior regression analyses highlighted a linkage between this inhibitory effect on the one  
21 hand, and pain ratings as well as empathic traits on the other. These findings imply that if the pain of  
22 others is genuine and thus calls for an appropriate empathic response, neural responses in the aIns  
23 indeed seem related to affect sharing and self-other distinction is engaged to avoid empathic over-  
24 arousal. In contrast, if others merely pretend to be in pain, the perceptual salience of their painful

25 expression results in neural responses that are down-regulated to avoid inappropriate affect sharing

26 and social support.

27

## 28 **Introduction**

29 As social beings, our own affective states are influenced by other people's feelings and affective  
30 states. The facial expression of pain by others acts as a distinctive cue to signal their pain to others,  
31 and thus results in sizeable affective responses in the observer. Certifying such responses as  
32 evidence for empathy, however, requires successful self-other distinction, the ability to distinguish  
33 the affective response experienced by ourselves from the affect experienced by the other person.

34 Studies using a wide variety of methods convergently have shown that observing others in pain  
35 engages neural responses aligning with those coding for the affective component of self-experienced  
36 pain, with the anterior insula (aIns) and the anterior mid-cingulate cortex (aMCC) being two key  
37 areas in which such an alignment has been detected (Lamm et al., 2011; Rütgen et al., 2015;  
38 Jauniaux et al., 2019; Xiong et al., 2019; Zhou et al., 2020; Fallon et al., 2020, for meta-analyses).

39 However, there is consistent debate on whether activity observed in these areas should indeed be  
40 related to the sharing of pain affect, or whether it may not rather result from automatic responses  
41 to salient perceptual cues - with pain vividly expressed on the face being one particularly prominent  
42 example (Zaki et al., 2016, for review). It was thus one major aim of our study to address this  
43 question. In this respect, contextual factors, individuals' appraisals, and attentional processes would  
44 all impact their exact response to the affective states of others (Gu & Han, 2007; Hein & Singer,  
45 2008, for review; Lamm et al., 2010; Forbes & Hamilton, 2020; Zhao et al., 2021). Recently, Coll et al.  
46 (2017) have thus proposed a framework that attempts to capture these influences on affect sharing  
47 and empathic responses. This model posits that individuals who see identical negative facial  
48 expressions of others may have different empathic responses due to distinct contextual information,  
49 and that this may depend on identification of the underlying affective state displayed by the other.

50 In the current functional magnetic resonance imaging (fMRI) study, we therefore created a situation  
51 where we varied the genuineness of the pain affect felt by participants while keeping the perceptual  
52 saliency (i.e., the quality and strength of pain expressions) identical. To this end, participants were

53 shown video clips of other persons who supposedly displayed genuine pain on their face vs. merely  
54 pretended to be in pain. Note that for reasons of experimental control, all painful expressions on the  
55 videos had been acted. This enabled us to interpret possible differences between conditions to the  
56 observers' appraisal of the situation rather than to putative visual and expressive differences. This  
57 way, we sought to identify the extent to which responses in affective nodes (such as the aIns and the  
58 aMCC) genuinely track the pain of others, rather than resulting predominantly from the salient facial  
59 expressions associated with the pain.

60 Another major aim of our study was to assess how self-other distinction allowed individuals to  
61 distinguish between the sharing of actual pain vs. regulating an inappropriate and potentially  
62 misleading "sharing" of what in reality is only a pretended affective state. We focused on the right  
63 supramarginal gyrus (rSMG), which has been suggested to act as a major hub selectively engaged in  
64 *affective* self-other distinction (Silani et al., 2013; Steinbeis et al., 2015; Hoffmann et al., 2016;  
65 Bukowski et al., 2020). Though previous studies have indicated that rSMG is functionally connected  
66 with areas associated with affect processing (Mars et al., 2011; Bukowski et al., 2020), we lack more  
67 nuanced insights into how exactly rSMG interacts with these areas, and thus how it supports  
68 accurate empathic responses. Hence, we used dynamic causal modeling (DCM) to investigate the  
69 hypothesized distinct interactions between affective responses and self-other distinction for the  
70 genuine and pretended pain situations, focusing on the aIns, aMCC, and their interaction with rSMG.  
71 Furthermore, we investigated the relationship between neural activity and behavioral responses as  
72 well as empathic traits. In line with the literature reviewed above, we expected that, on the  
73 behavioral level, genuine pain would result in – alongside the obvious other-oriented higher pain  
74 ratings – higher self-oriented unpleasantness ratings. On the neural level, we predicted aIns and  
75 aMCC to show a stronger response to the genuine expressions of pain, but that these areas would  
76 also respond to the pretended pain, but to a lower extent. Differences in rSMG engagement and  
77 distinct patterns of this area's effective connectivity with aIns and aMCC were expected to relate to

78 self-other distinction, and thus to explain the different empathic responses to genuine vs. pretended  
79 pain.

## 80 **Results**

### 81 **Behavioral results**

82 Three repeated-measures ANOVAs were performed with the factors *genuineness* (genuine vs.  
83 pretended and *pain* (pain vs. no pain), for each of the three behavioral ratings. For ratings of painful  
84 expressions in others (Figure 1C, left), there was a main effect of the factor genuineness: participants  
85 showed higher ratings for the genuine vs. pretended conditions,  $F_{\text{genuineness}}(1, 42) = 8.816, p = 0.005,$   
86  $\eta^2 = 0.173$ . There was also a main effect of pain: participants showed higher ratings for the pain vs.  
87 no pain conditions,  $F_{\text{pain}}(1,42) = 1718.645, p < 0.001, \eta^2 = 0.976$ . The interaction term was significant  
88 as well,  $F_{\text{interaction}}(1, 42) = 7.443, p = 0.009, \eta^2 = 0.151$ , and this was related to higher ratings of  
89 painful expressions in others for the genuine pain compared to the pretended pain condition. For  
90 ratings of painful feelings in others (Figure 1C, middle), there was a main effect of genuineness:  
91 participants showed higher ratings for the genuine vs. pretended conditions,  $F_{\text{genuineness}}(1, 42) =$   
92  $770.140, p < 0.001, \eta^2 = 0.948$ . There was also a main effect of pain, as participants showed higher  
93 ratings for the pain vs. no pain conditions,  $F_{\text{pain}}(1,42) = 1544.762, p < 0.001, \eta^2 = 0.974$ . The  
94 interaction for painful feelings ratings was significant as well,  $F_{\text{interaction}}(1, 42) = 752.618, p < 0.001, \eta^2$   
95  $= 0.947$ , and this was related to higher ratings of painful feelings in others for the genuine pain  
96 compared to the pretended pain condition. For ratings of unpleasantness in self (Figure 1C, right),  
97 there was a main effect of genuineness: participants showed higher ratings for the genuine vs.  
98 pretended conditions,  $F_{\text{genuineness}}(1, 42) = 74.989, p < 0.001, \eta^2 = 0.641$ . There was also a main effect  
99 of pain: participants showed higher ratings for the pain vs. no pain conditions,  $F_{\text{pain}}(1,42) = 254.709,$   
100  $p < 0.001, \eta^2 = 0.858$ . The interaction for unpleasantness ratings was significant as well,  $F_{\text{interaction}}(1,$   
101  $42) = 73.620, p < 0.001, \eta^2 = 0.637$ , and this was related to higher ratings of unpleasantness in self  
102 for the genuine pain compared to the pretended pain condition. In sum, the behavioral data

103 indicated higher ratings and large effect sizes of painful feelings in others and unpleasantness in self  
104 for the genuine compared to the pretended pain condition. Ratings of pain expressions also differed  
105 in terms of genuineness, at comparably low effect size, though they were expected to not show a  
106 difference by way of our experimental design and the pilot study.

107 We also found a significant correlation between behavioral ratings of painful feelings in others and  
108 unpleasantness in self in the genuine pain condition,  $r = 0.691$ ,  $p < 0.001$ ; while in the pretended  
109 pain condition, the correlation was not significant,  $r = 0.249$ ,  $p = 0.107$  (Figure 1D). A bootstrapping  
110 comparison showed a significant difference between the two correlation coefficients,  $p = 0.002$ , 95%  
111 Confidence Interval (CI) = [0.230, 1.060].

112 [Insert Figure 1 here]

### 113 **fMRI results: mass-univariate analyses**

114 Three contrasts were computed: 1) genuine: pain – no pain, 2) pretended: pain – no pain, and 3)  
115 genuine (pain – no pain) – pretended (pain – no pain). Across all three contrasts, we found  
116 activations as hypothesized in bilateral aIns, aMCC, and rSMG (Figure 2A and Table 1).

117 To identify whether or which brain activity was specifically related to the behavioral ratings  
118 described above, we performed a multiple regression analysis where we explored the relationship of  
119 activation in the contrast genuine pain – pretended pain with the three behavioral ratings. We found  
120 significant clusters in bilateral aIns, visual cortex, and cerebellum (Figure 2B); notably, when  
121 statistically accounting for ratings of painful expressions in others and painful feelings in others, all  
122 three clusters were exclusively explained by the ratings of self-unpleasantness.

123 [Insert Figure 2 here]

124 [Insert Table 1 here]

### 125 **DCM results**

126 We performed DCM analysis to specifically examine the modulatory effect of genuineness on the  
127 effective connectivity between the right alns and rSMG. More specifically, we sought to assess  
128 whether the experimental manipulation of genuine pain vs. pretended pain tuned the bidirectional  
129 neural dynamics from alns to rSMG and *vice versa*, in terms of both directionality (sign of the DCM  
130 parameter) and intensity (magnitude of the DCM parameter). If the experimental manipulation  
131 modulated the effective connectivity, we would observe a strong posterior probability ( $p_p > 0.95$ ) of  
132 the modulatory effect. Our original analysis plan was to include aMCC in the DCM analyses, but  
133 based on the fact that aMCC did not show as strong evidence (in terms of the multiple regression  
134 analysis) as the alns of being involved in our task, we decided to use a more parsimonious DCM  
135 model without the aMCC.

136 We found strong evidence of inhibitory effects on the alns to rSMG connection both in the genuine  
137 pain condition and in the pretended pain condition (Figure 3A, 3B and 3C). Comparing the strength  
138 of these modulatory effects on the alns to rSMG connection revealed a reduced inhibitory effect for  
139 genuine pain as opposed to pretended pain,  $t_{41} = 2.671$ ,  $p = 0.011$  (Mean<sub>genuine pain</sub> = -0.821, 95% CI =  
140 [-0.878, -0.712]; Mean<sub>pretended pain</sub> = -0.934, 95% CI = [-1.076, -0.822]; Figure 3C). There was no  
141 evidence of a modulatory effect on the rSMG to alns connection.

#### 142 **Individual associations between modulatory effects, behavioral ratings and questionnaires**

143 To examine how the modulatory effects from the DCM were related to the behavioral ratings, we  
144 computed two stepwise linear regression models for each condition. The regression model was  
145 significant for the genuine pain condition ( $F_{\text{model}(1,41)} = 4.639$ ,  $p = 0.037$ ,  $R^2 = 0.104$ ), when painful  
146 feelings in others were added to the model and the other two ratings were excluded ( $B = 0.079$ ,  $\beta$   
147 = 0.322,  $p = 0.037$ ). However, the model was not significant for the pretended pain condition (Figure  
148 3D). The variance inflation factors (VIFs) for three ratings in both models were calculated to diagnose  
149 collinearity, showing no severe collinearity problem (all VIFs < 5; the smallest VIF = 1.132 and the  
150 largest VIF = 4.387).

151 In addition, we tested two stepwise linear regression models to investigate whether subscales of all  
152 three questionnaires could explain modulatory effects for genuine pain and pretended pain. In the  
153 genuine pain condition, we found that the modulatory effect was significantly explained by scores of  
154 two subscales, i.e., affective ability and affective reactivity of the ECQ:  $F_{\text{model}}(1,39) = 6.829$ ,  $p =$   
155  $0.003$ ,  $R^2 = 0.270$ ;  $B_{\text{affective ability}} = 0.052$ ,  $\beta = 0.497$ ,  $p = 0.002$ ;  $B_{\text{affective reactivity}} = -0.040$ ,  $\beta = -0.421$ ,  
156  $p = 0.008$ . No significant predictor was found with the other questionnaires (i.e., IRI and TAS). In the  
157 pretended pain condition, none of the three questionnaires significantly predicted variations of the  
158 modulatory effect. No severe collinearity problem was detected for either regression model (all  $VIFs$   
159  $< 2$ ; the smallest  $VIF = 1.011$  and the largest  $VIF = 1.600$ ).

160 [Insert Figure 3 here]

## 161 Discussion

162 In this study, we developed and used a novel experimental paradigm in which participants watched  
163 video clips of persons who supposedly either genuinely experienced or merely pretended to be in  
164 strong pain. Combining mass-univariate analysis with effective connectivity (DCM) analyses, our  
165 study provides evidence on the distinct neural dynamics between regions suggestive of affect  
166 processing (i.e., aIns and aMCC) and self-other distinction (i.e., rSMG) for genuinely sharing vs.  
167 responding to pretended, non-genuine pain. With this, we aimed to clarify two main questions: First,  
168 whether neural responses in areas such as the aIns and aMCC to the pain of others are indeed  
169 related to a veridical sharing of affect, as opposed to simply tracking automatic responses to salient  
170 affective displays. And second, how processes related to self-other distinction, implemented in the  
171 rSMG, enable appropriate empathic responses to genuine vs. merely pretended affective states.

172 The mass-univariate analyses suggest that the increased activity in aIns for genuine pain as opposed  
173 to pretended pain properly reflects affect sharing. As aforementioned, the network of affective  
174 sharing and certain domain-general processes (e.g., salience detection and automatic emotion  
175 processing) overlap in aIns and aMCC (Zaki et al., 2016, for review). This indicates that indeed, part



176 of the activation in these areas could be related to perceptual salience, which is why it has been  
177 widely debated as a potential confound of empathy and affect sharing models (Zaki et al., 2016;  
178 Lamm et al., 2019, for review). However, when comparing genuine pain versus pretended pain,  
179 activity in these areas was not only found to be stronger in response to genuine pain, but the  
180 increased activation in aIns was also selectively correlated with ratings of self-oriented  
181 unpleasantness (i.e., after statistically accounting for painful expressions and painful feelings in  
182 others). That only aIns and not also aMCC shows such correlation may be explained by previous  
183 studies, according to which aIns is more specifically associated with affective representations, while  
184 the role of aMCC rather seems to evaluate and regulate emotions that arise due to empathy (Fan et  
185 al., 2011; Lamm et al., 2011; Jauniaux et al., 2019). Taken together, the activation and brain-behavior  
186 findings provide evidence that responses in aIns (and to a lesser extent also the aMCC) are not  
187 simply automatic responses triggered by perceptually salient events. Rather, they seem to track the  
188 actual affective states of the other person, and thus the shared neural representation of that  
189 response (see Zhou et al., 2020, for similar recent conclusions based on multi-voxel pattern  
190 analyses). Our findings are also in line with the proposed model of Coll et al. (2017), which suggests  
191 that affect sharing is the consequence of emotion identification. More specifically, while part of the  
192 activation in the aIns and aMCC is indeed related to an (presumably earlier) automatic response, the  
193 added engagement of these areas once they have identified the pain as genuine shows that only in  
194 this condition, they then also engage in proper affect sharing. Ideally, one should be able to discern  
195 these processes in time, but neither the temporal resolution of our fMRI measurements nor the  
196 paradigm in which we always announced the conditions beforehand would have been sensitive  
197 enough to do so. Thus, future studies including complementary methods such as EEG and MEG, and  
198 tailored experimental designs are needed to pinpoint the exact sequence of processes engaged in  
199 automatic affective responses vs. proper affect sharing.

200 Beyond higher activation in affective nodes supporting (pain) empathy, increased activation was also  
201 found in rSMG. This area was shown to be engaged in action observation and imitating emotions

202 (Bach et al., 2010; Pokorny et al., 2015; Gola et al., 2017; Hawco et al., 2017), and a specific role in  
203 affective rather than cognitive self-other distinction has been identified for rSMG (Silani et al., 2013;  
204 Steinbeis et al., 2015; Bukowski et al., 2020). Based on such findings, it has been proposed that the  
205 rSMG allows for a rapid switching between or the integration of self- and other-related  
206 representations, as two processes that may underpin the functional basis of successful self-other  
207 distinction (Lamm et al., 2016, for review). Concerning the current findings, we thus propose that  
208 the higher rSMG engagement in the genuine pain condition reflects an increasing demand for self-  
209 other distinction imposed by the stronger shared negative affect experienced in this condition.  
210 Theoretical models of empathy and related socio-affective responses suggest that such regulation is  
211 especially important to avoid so-called empathic over-arousal, which would shift the focus away  
212 from empathy and the other's needs, towards taking care of one's own personal distress (Batson et  
213 al., 1987; Decety & Lamm, 2011, for review).

214 Beyond these differences in the magnitude of rSMG activation, the DCM analysis demonstrated less  
215 inhibition on the aIns-to-rSMG connection for genuine pain compared to pretended pain. Various  
216 theoretical accounts suggest that areas such as the aIns and rSMG may play a key role in comparing  
217 self-related information with the sensory evidence (Decety & Lamm, 2007; Seth, 2013, for review).  
218 According to recent theories on predictive processing (Clark, 2013, for review) and active inference  
219 (Friston, 2010, for review), the brain can be regarded as a "prediction machine", in which the top-  
220 down signals pass over predictions and the bottom-up signals convey prediction errors across  
221 different levels of cortical hierarchies (Chen et al., 2009; Friston, 2010, for review; Bastos et al.,  
222 2015). It is suggested that these top-down predictions are mediated by inhibitory neural connections  
223 (Zhang et al., 2008; Bastos et al., 2015; Miska et al., 2018). Our findings align with such views, by  
224 suggesting that the inhibitory connection from aIns to rSMG can be explained as the predictive  
225 mismatch between the top-down predictions of self-related information (e.g., personal affect) and  
226 sensory inputs (e.g., pain facial expressions). This suppression of neural activity leads to an  
227 *explaining away* of incoming bottom-up prediction error. This is reflected by the absence of any

228 condition-dependent modulatory effects on the rSMG to alns connection, suggesting that the  
229 influence of the task conditions is sufficiently modeled by the predictions from alns to rSMG.  
230 Therefore, the stronger inhibition for pretended pain, compared to genuine pain, could indicate a  
231 higher demand to overcome the mismatch between the visual inputs and the agent's prior beliefs  
232 and contextual information about the situation (i.e., "this person looks like in pain, but I know  
233 he/she does not actually feel it"). The reduced inhibition in the genuine pain condition could  
234 moreover be a mechanism that explains the higher rSMG activation in this condition.

235 We also found the strength of the inhibitory effect in the genuine pain condition to correlate with  
236 ratings of painful feelings in others, but not with the ratings of pain expression in others or  
237 unpleasantness in self. For the pretended pain condition none of the ratings showed a correlation.  
238 The latter could in principle be due to a lack of variation in the ratings (which by way of the design  
239 were mostly close to zero or one). We deem it more plausible, though, that the correlation findings  
240 provide further evidence that the modulation of alns to rSMG is implicated in encoding others'  
241 emotional states when participants engaged in genuine affect sharing. It is also interesting to note  
242 that the found correlation relates to cognitive evaluations of the other's pain rather than to own  
243 affect, as tracked by the unpleasantness in self-ratings. This would to some extent be in line with  
244 DCM findings by Kanske et al. (2016). These authors found that the inhibition of the temporoparietal  
245 junction (TPJ) by the alns was linked to interactions between Theory of Mind (ToM) and empathic  
246 distress, i.e., the interaction of "cognitive" vs. "affective" processes engaged in understanding  
247 others' cognitive and affective states. Note that the right TPJ is an overarching area involved in self-  
248 other distinction of which rSMG is considered a part or at least closely connected to (Decety &  
249 Lamm, 2007, for review).

250 The correlations between the DCM inhibitory effect and empathic traits assessed via questionnaires  
251 provide further refinements for the relevance of rSMG in implementing self-other distinction to  
252 allow for an appropriate empathic response. When participants shared genuine affect, the inhibitory

253 effect on the aIns to rSMG connection was positively correlated with affective ability and negatively  
254 correlated with affective reactivity. Affective ability reflects the capacity to subjectively share  
255 emotions with others, while affective reactivity plays a role in the susceptibility to vicarious distress  
256 and thus to more automatic responses to another's emotion (Batchelder et al., 2017). Again, as for  
257 the correlations with the three rating scales, we did not find correlations of empathic traits for the  
258 pretended pain condition. Taken together, the DCM results and their qualification by the correlation  
259 findings suggest that in the genuine pain condition, which requires an accurate sharing of pain, rSMG  
260 interacts with aIns to achieve "affective-to-affective" self-other distinction – i.e., disambiguating  
261 affective signals originating in the self from those attributable to the other person. The aIns to rSMG  
262 connection in the pretended pain condition may reflect a related, yet slightly distinct mechanism.  
263 Here, it seems that "cognitive-to-affective" self-other distinction is at play, which helps resolve  
264 conflicting information between the top-down contextual information (i.e., that the demonstrator is  
265 not actually in pain) from what seems an unavoidable affective response to the highly salient  
266 perceptual cue of the facial expression of pain. Given our behavioral and trait data did not allow us  
267 to distinguish more precisely between these different types of self-other distinction, this however  
268 remains an interpretation and a hypothesis that will require further investigation.

269 One potential limitation of the study could be the slightly higher ratings of other-oriented pain  
270 expressions for genuine pain, which were hypothesized to have no difference, as compared to  
271 pretended pain. As we found the enhanced aIns activation in the genuine pain condition mainly  
272 tracked personal unpleasantness rather than perceptually domain-general processes, and because  
273 the effect size of the pain expression difference was much smaller than for the affect ratings, we  
274 consider this difference did not fundamentally influence the interpretation of our findings.

275 In conclusion, the current study advances our understanding of two main aspects of empathy. First,  
276 we provide evidence that empathy-related responses in the aIns can indeed be linked to affective  
277 sharing, rather than attributing them to responses triggered only by perceptual saliency. Second, we

278 show how aIns and rSMG are orchestrated to track what another person really feels, thus enabling  
279 us to appropriately respond to their actual needs. Beyond these basic research insights, our study  
280 provides novel avenues for clinical application, and the investigation of contextual and interpersonal  
281 factors in the accurate diagnosis of pain and its expression.

## 282 **Materials and Methods**

### 283 **Participants**

284 Forty-eight participants took part in the study. Five of them were excluded because of excessive  
285 head motion (> 15% scans with the frame-wise displacement over 0.5 mm in one session). Data of  
286 the remaining 43 participants (21 females; age: Mean = 26.72 years, S.D. = 4.47) were entered into  
287 analyses. This sample size was determined on a priori power analysis in Gpower 3.1 (Faul et al.,  
288 2007). We assumed a medium effect size of *Cohen's d* = 0.5. After calculation, the minimum sample  
289 size statistically required for this study was 34 ( $\alpha = 0.05$ , two-tailed,  $1-\beta = 0.80$ ). Participants were  
290 pre-screened by an MRI safety-check questionnaire, assuring normal or corrected to normal vision  
291 and no presence or history of neurologic, psychiatric, or major medical disorders. All participants  
292 were being right-handed (self-reported) and provided written consent including post-disclosure of  
293 any potential deception. The study was approved by the ethics committee of the Medical University  
294 of Vienna and was conducted in line with the latest version of the Declaration of Helsinki (2013).

### 295 **Manipulation of facial expressions**

296 As part of our study we developed a novel experimental design and corresponding stimuli, which  
297 consisted of video clips showing different demonstrators ostensibly in four different situations: 1)  
298 Genuine pain: the demonstrator's right cheek was penetrated by a hypodermic needle attached to a  
299 syringe, and the demonstrator's facial expression changed from neutral to a strongly painful facial  
300 expression. 2) Genuine no pain: the demonstrator maintained a neutral facial expression when a Q-  
301 tip fixed on the backend of the same syringe touched their right cheek. 3) Pretended pain: the

302 demonstrator's right cheek was approached by the same syringe and the hypodermic needle, with  
303 the latter covered by a protective cap; upon touch by the cap, the demonstrator's facial expression  
304 changed from neutral to a strongly painful facial expression. 4) Pretended no pain: the demonstrator  
305 maintained a neutral facial expression when a Q-tip fixed on the backend of the same syringe  
306 touched their right cheek.

307 To create these stimuli, we recruited 20 demonstrators (10 females), with experience in acting, and  
308 filmed them in front of a dark blue background. An experimenter who stood on the right side of the  
309 demonstrators, but of whom only the right hand holding the syringe could be seen, administered the  
310 injections and touches. Unbeknownst to the participants, all painful expressions were acted, as the  
311 needle was a telescopic needle (i.e., a needle that seemed to enter the cheek upon contact, but in  
312 reality, was invisibly retracting into the syringe). The reason for using a protective cap in the  
313 pretended pain condition was to match the perceptual situation that an aversive object was  
314 approaching a body part in both pain conditions. In all situations, the demonstrator was instructed  
315 to look naturally towards the camera 1.5 m in front of them. As soon as the needle or the cap  
316 touched the demonstrator's cheek, the demonstrator made a painful facial expression, as naturally  
317 and vividly as possible. In the neutral control conditions, demonstrators maintained a neutral facial  
318 expression when a Q-tip fixed at the backend of the syringe touched their cheek. Again, a syringe  
319 with a needle attached to the other end was used to perceptually control for the presence of an  
320 aversive object in all four conditions. Note that in another set of conditions, demonstrators showed  
321 disgusted or neutral expressions. Data from these conditions will be reported elsewhere. All  
322 demonstrators signed an agreement that their video clips and static images could be used for  
323 scientific purposes.

#### 324 **Stimulus validation and pilot study**

325 To validate the stimuli, we performed an online validation study with N = 110 participants, who were  
326 asked to rate a total of 120 video clips of 2 s duration of the two conditions (60 of each condition)

327 showing painful expressions (i.e., the genuine and the pretended pain conditions). The main aim of  
328 the validation study was to identify a set of demonstrators that expressed pain with comparable  
329 intensity and quality, and whose pain expressions in the genuine and pretended conditions were  
330 comparable. After each video clip, participants rated three questions on a visual analog scale with 9  
331 tick-marks and the two end-points marked as “almost not at all” to “unbearable”: 1) How much pain  
332 did the person *express* on his/her face? 2) How much pain did the person *actually* feel? 3) How  
333 *unpleasant* did you feel to watch the person in this situation? The order of these three questions  
334 was pseudo-randomized. Moreover, eight catch trials randomly interspersed across the validation  
335 study to test whether participants maintained attention to the stimuli. Here, participants were asked  
336 to correctly select the demonstrator they had seen in the last video, between two static images of  
337 the correct and a distractor demonstrator displayed side by side, both showing neutral facial  
338 expressions.

339 The validation study was implemented within the online survey platform SoSci Survey  
340 (<https://www.soscisurvey.de>), with a study participation invite published on Amazon Mechanical  
341 Turk (<https://www.mturk.com/>), a globally commercial platform allowing for online testing. Survey  
342 data of 62 out of 110 participants (34 females; age: Mean = 28.71 years, S.D. =10.11) were entered  
343 into analysis (inclusion criteria: false rate for the test questions < 2/8, survey duration > 20 min and <  
344 150 min, and the maximum number of continuous identical ratings < 5). Based on this validation  
345 step, we had to exclude videos of 6 demonstrators (3 females) for which participants showed a  
346 significant difference in painful expressions in others between the genuine pain and the pretended  
347 pain conditions. As a result of this validation, videos of 14 demonstrators (7 females), which showed  
348 no difference in the pain *expression* rating between genuine and pretended conditions, and which  
349 overall showed comparable mean ratings in all three ratings, were selected for the subsequent pilot  
350 study.

351 In the pilot study, 47 participants (24 females; age: Mean = 26.28 years, S.D. = 8.80) were recruited  
352 for a behavioral experiment in the behavioral laboratory. The aim was to verify the experimental  
353 effects and the feasibility of the experimental procedures that we intended to use in the main fMRI  
354 experiment, as well as to identify video stimuli that may not yield the predicted responses. Thus, all  
355 four conditions described above were presented to the participants. Participants were explicitly  
356 instructed that they would watch other persons' genuine painful expressions in some blocks, while  
357 in other blocks, they would see other persons acting out painful expressions (recall that in reality, all  
358 demonstrators had been actors, and the information about this type of necessary deception was  
359 conveyed to participants at the debriefing stage). They would see all demonstrators' neutral  
360 expressions as well. Participants were instructed to rate the three questions mentioned above. Upon  
361 screening for video clips that showed aberrant responses, we excluded videos of two demonstrators  
362 (1 female), for whom the pain *expression* rating difference between the pretended vs. genuine  
363 expressions was large. 48 videos of 12 demonstrators entered the following analyses. Three separate  
364 repeated-measures ANOVAs were respectively performed for the three rating questions. For the  
365 main effect of *genuineness* (genuine vs. pretended), it was not significant and low in effect size for  
366 painful expressions in others ( $F_{\text{genuineness}}(1, 46) = 2.939, p = 0.093, \eta^2 = 0.060$ ), but was significant  
367 with high effect size for the painful feelings in others ( $F_{\text{genuineness}}(1, 46) = 280.112, p < 0.001, \eta^2 =$   
368  $0.859$ ) as well as the unpleasantness in self ( $F_{\text{genuineness}}(1, 46) = 43.143, p < 0.001, \eta^2 = 0.484$ ). The  
369 main effects of *pain* (pain vs. no pain) for all three questions were found significant with high effect  
370 size (the smallest effect size was for the rating of unpleasantness in self,  $F_{\text{pain}}(1, 46) = 82.199, p <$   
371  $0.001, \eta^2 = 0.641$ ). Our pilot study thus a) provided assuring evidence that the novel experimental  
372 paradigm worked as expected, and b) made it possible to select video clips that we could match for  
373 the two conditions (i.e., genuine pain and pretended pain). More specifically, as expected and  
374 required for the main study, participants rated the painfulness of the demonstrators to be  
375 substantially higher when it was genuine as compared to those that were pretended, and this also  
376 resulted in much higher unpleasantness experienced in the self. It is worth noting that, the two



377 conditions did not differ with respect to the ratings of the painful facial expressions, implying that  
378 putative differences in ratings as well as the subsequent brain imaging data could only be attributed  
379 to the contextual appraisal of the demonstrators' actual painful states, rather than the differences in  
380 facial pain perception. Based on this pilot study, we thus decided on video clips of 12 demonstrators  
381 (6 females) in the main fMRI experiment.

### 382 **Experimental design and procedure of the fMRI study**

383 The experiment was implemented using Cogent 2000 (version 1.33;  
384 [http://www.vislab.ucl.ac.uk/cogent\\_2000.php](http://www.vislab.ucl.ac.uk/cogent_2000.php)). MRI scanning took place at the University of Vienna  
385 MRI Center. Once participants arrived at the scanner site, an experimenter instructed them that they  
386 would watch videos from the four conditions outlined above. Participants were explicitly instructed  
387 to recreate the feelings of the demonstrators shown in the videos as vividly and intensely as  
388 possible. Based on the validation and pilot study, the painful *expressions* for the genuine and  
389 pretended conditions were matched. We also counterbalanced the demonstrators appearing in the  
390 genuine and pretended conditions across participants, thus controlling for differences in behavioral  
391 and brain response that could be explained by differences between the stimulus sets. Note that, all  
392 video clips were validated and piloted multiple times to ensure the experimental effect (details can  
393 be found in the section above).

394 The participant performed the fMRI experiment in two runs (Figure 1A and 1B). Each run was  
395 composed of two blocks showing genuine pain and two blocks showing pretended pain. In each  
396 block, the participant watched nine video clips containing both painful and neutral videos. To remind  
397 participants' the condition of the upcoming block, a label of 4 s duration appeared at the beginning  
398 of each block, showing either "genuine" or "pretended" (in German). Each trial started with a  
399 fixation cross (+) presented for 4 – 7 s (in steps of 1.5 s, Mean = 5.5 s). After that, the video (duration  
400 = 2 s) was played. A short jitter was inserted after the video for 0.5 – 1.0 s (in steps of 0.05 s, Mean =  
401 0.75 s). After the jitter, the following three questions were displayed (in German) one after the other

402 in a pseudo-randomized order: 1) How much pain did the person *express* on his/her face? 2) How  
403 much pain did the person *actually feel*? 3) How *unpleasant did you feel* to watch the person in this  
404 situation? Beneath each question, a visual analog scale ranging from 0 (not at all) to 8 (unbearable)  
405 with 9 tick-marks was positioned. The participant moved the marker along the scale by pressing the  
406 left or right keys on the button box, and they pressed the middle key to confirm their answer. The  
407 marker initially was always located at the midpoint (“4”) of the scale. When the confirmed key was  
408 pressed, the marker turned from black to red. All ratings lasted for 4 s even when the participant  
409 pressed the confirmed key before the end of this period. Between the two runs, the participant had  
410 a short break (1-2 min).

411 Before entering the scanner, participants conducted practice trials on the computer to get  
412 familiarized with the button box and the experimental interface. After that, participants were moved  
413 into the scanner and performed the task. Following the functional imaging runs, a 6.5 min structural  
414 scanning was employed. When participants finished the scanning session, they were scheduled for a  
415 date to complete three questionnaires in the lab: the Empathy Components Questionnaire (ECQ)  
416 (Batchelder, 2015; Batchelder et al., 2017), the Interpersonal Reactivity Index (IRI) (Davis, 1980), and  
417 the Toronto Alexithymia Scale (TAS) (Bagby et al., 1994). For the ECQ, there are 27 items in total to  
418 be categorized into five subscales: cognitive ability, cognitive drive, affective ability, affective drive,  
419 and affective reactivity, using a 4-point Likert scale ranging from 1 (“strongly disagree”) to 4  
420 (“strongly agree”) (Batchelder, 2015; Batchelder et al., 2017). For the IRI, there are 28 items divided  
421 into four subscales: perspective taking, fantasy, empathic concern, and personal distress, using a 5-  
422 point Likert scale ranging from 0 (“does not describe me well”) to 4 (“describes me very well”)  
423 (Davis, 1980). For the TAS, there are 20 items and three subscales - difficulty describing feelings,  
424 difficulty identifying feelings, and externally oriented thinking, using a 5-point Likert scale ranging  
425 from 1 (“strongly disagree”) to 5 (“strongly agree”) (Bagby et al., 1994). The average interval  
426 between the scanning session and the lab survey was one week. The participant was debriefed after  
427 completing the whole study.

428 **Behavioral data analysis**

429 We applied repeated-measures ANOVAs to investigate the main effects and the interaction of the  
430 two factors genuine vs. pretended and pain vs. no pain, using SPSS (version 26.0; IBM). Furthermore,  
431 we conducted Pearson correlations to examine whether ratings of painful feelings in others were  
432 correlated with unpleasantness in self for the genuine pain and the pretended pain. The correlation  
433 coefficients were further compared using a bootstrap approach with the R package bootcorci  
434 (<https://github.com/GRousselet/bootcorci>).

435 **fMRI data acquisition**

436 fMRI data were collected using a Siemens Magnetom Skyra MRI scanner (Siemens, Erlangen,  
437 Germany) with a 32-channel head coil. Functional whole-brain scans were collected using a  
438 multiband-accelerated T2\*-weighted echoplanar imaging (EPI) sequence (multiband acceleration  
439 factor = 4, interleaved ascending acquisition in multi-slice mode, 52 slices co-planar to the  
440 connecting line between anterior and posterior commissure, TR = 1200 ms, TE = 34 ms, acquisition  
441 matrix =  $96 \times 96$  voxels, FOV =  $210 \times 210$  mm<sup>2</sup>, flip angle = 66°, inter-slice gap = 0.4 mm, voxel size =  
442  $2.2 \times 2.2 \times 2$  mm<sup>3</sup>). Two functional imaging runs, each lasting around 16 min (~800 images per run),  
443 were performed. Structural images were acquired with a magnetization-prepared rapid gradient-  
444 echo (MPRAGE) sequence (TE/TR = 2.43/2300 ms, flip angle = 8°, ascending acquisition, single-shot  
445 multi-slice mode, FOV=  $240 \times 240$  mm<sup>2</sup>, voxel size =  $0.8 \times 0.8 \times 0.8$  mm<sup>3</sup>, 208 sagittal slices, slice  
446 thickness = 0.8 mm).

447 **fMRI data processing and mass-univariate functional segregation analyses**

448 Imaging data were preprocessed with a combination of Nipype (Gorgolewski et al., 2011) and  
449 MATLAB (version R2018b 9.5.0; MathWorks) with Statistical Parametric Mapping (SPM12;  
450 <https://www.fil.ion.ucl.ac.uk/spm/software/spm12/>). Raw data were imported into BIDS format  
451 (<http://bids.neuroimaging.io/>). Functional data were subsequently preprocessed using slice timing

452 correction to the middle slice (Sladky et al., 2011), realignment to the first image of each session, co-  
453 registration to the T1 image, segmentation between grey matter, white matter and cerebrospinal  
454 fluid (CSF), normalization to MNI template space using Diffeomorphic Anatomical Registration  
455 Through Exponentiated Lie Algebra (DARTEL) toolbox (Ashburner, 2007), and smoothing with a 6  
456 mm full width at half-maximum (FWHM) three-dimensional Gaussian kernel.

457 To improve data quality, we performed data scrubbing of the functional scans for those whose  
458 frame-wise displacements (FD) were over 0.5 mm (Power et al., 2012; Power et al., 2014). In other  
459 words, we identified individual outlier scans and flagged the volume indices as nuisance regressors  
460 in the general linear model (GLM) for the first-level analysis.

461 In order to perform mass-univariate functional segregation analyses, a first-level GLM design matrix  
462 was created and composed of two identically modeled runs for each participant. Seven regressors of  
463 interest were entered in each model: stimulation phase of the four conditions (i.e., genuine pain,  
464 genuine no pain, pretended pain, pretended no pain; 2000 ms), rating phase of the three questions  
465 (i.e., painful expressions in others, painful feelings in others, and unpleasantness in self; 12000 ms).  
466 Six head motion parameters and the scrubbing regressors (FD > 0.5 mm; if applicable) were  
467 additionally entered as nuisance regressors. Individual contrasts of the four conditions and the three  
468 ratings (all across the two runs) against implicit baseline were respectively created.

469 On the second level, a flexible factorial design was employed to perform the group-level analysis.  
470 The design included three factors: a between-subject factor (i.e., subject) that was specified  
471 independent and with equal variance, a within-subject factor (i.e., genuine or pretended) that was  
472 specified dependent and with equal variance, and a second within-subject factor (i.e., pain or no  
473 pain) that was specified dependent and with equal variance (Gläscher & Gitelman, 2008). Three  
474 contrasts were computed: (1) main effect of genuine: pain – no pain, (2) main effect of pretended:  
475 pain – no pain, and (3) interaction: genuine (pain – no pain) – pretended (pain – no pain). We  
476 applied an initial threshold of  $p < 0.001$  (uncorrected) at the voxel level and a family-wise error

477 (FWE) correction ( $p < 0.05$ ) at the cluster level. The cluster extent threshold was determined by the  
478 SPM extension “cp\_cluster\_Pthresh.m” (<https://goo.gl/kjVydz>).

#### 479 **Brain-behavior relationships**

480 A multiple regression model was built on the group level to investigate the relationship between  
481 specific brain activations and behavioral ratings. In this model, the contrast genuine pain –  
482 pretended pain was set as the dependent variable, and three behavioral ratings were specified as  
483 independent variables. All covariates were mean-centered. The model aimed to test which brain  
484 activations of the contrast could be explained by an independent variable after accounting for the  
485 other two. Note that, we performed the regression model with the contrast genuine pain –  
486 pretended pain instead of the more exhaustive contrast genuine (pain - no pain) - pretended (pain –  
487 no pain), and this was because the genuine and the pretended pain conditions were the main focus  
488 of our work. Moreover, the pain contrast showed more robust (in terms of statistical effect size) and  
489 widespread activations across the brain, making it more likely to pick up possible brain-behavior  
490 relationships. The same threshold as above was applied in this analysis.

491 We aimed to assess these brain-behavior relationships for the following regions of interest (ROI): 1)  
492 alns and aMCC, i.e., two regions associated with affective processes and specifically with empathy  
493 for pain, 2) rSMG, an area implicated in affective self-other distinction. The ROI masks were defined  
494 as the conjunction of the averaging contrast between genuine and pretended: pain – no pain  
495 (threshold: voxel-wise FWE correction,  $p < 0.05$ ) and the anatomical masks created by the Wake  
496 Forest University (WFU) Pick Atlas SPM toolbox (<http://fmri.wfubmc.edu>) with the automated  
497 anatomical atlas (AAL). The ROI masks were created with Marsbar ROI Toolbox implemented in  
498 SPM12 (Brett et al., 2002). Note that we specifically selected the ROIs this way, such that they were  
499 orthogonal (i.e., independent) to the subsequent analyses of interest. As exploratory analyses found  
500 significant correlations mainly in alns, rather than in aMCC, we will focus in the results section on

501 two ROIs: the right aIns and the rSMG. Focusing on the right aIns instead of the left one was because  
502 the right aIns is on the ipsilateral hemisphere as rSMG.

### 503 **Analyses using dynamic causal modeling (DCM)**

504 To investigate the functional network involved in affective processes and self-other distinction and  
505 how it was modulated by our experimental manipulations (i.e., genuine pain and pretended pain),  
506 we used DCM to estimate the effective connectivity between the ROIs based on the tasked-related  
507 brain responses (Stephan & Friston, 2010, for review). The DCM analyses were conducted with  
508 DCM12.5 implemented in SPM12 (v. 7771). Firstly, we extracted individual time series separately for  
509 each ROI. To ensure the selected voxels engaged in a task-relevant activity but not random signal  
510 fluctuations, we determined the voxels both on a group-level threshold and an individual-level  
511 threshold (Holmes et al., 2020). An initial threshold was set as  $p < 0.05$ , uncorrected. The significant  
512 voxels in the main effect of genuine pain and pretended pain were further selected by an individual  
513 threshold. For each participant, an individual peak coordinate within the ROI mask was searched and  
514 an individual mask was consequently defined using a sphere of the 6 mm radius around the peak. As  
515 a result, the individual time series for each ROI was extracted from the significant voxels of the  
516 individual mask and summarized by the first eigenvariate. One participant was excluded as no voxels  
517 survived significance testing. Secondly, we specified three regressors of interest: genuine pain,  
518 pretended pain, and the video input condition (the combination of genuine pain and pretended  
519 pain). That we did not specify no-pain conditions was because 1) the pain conditions were our main  
520 focus, and 2) adding no-interest conditions would inevitably increase the model complexity. Then, a  
521 fully connected DCM model for each participant was created. Three parameters were specified: 1)  
522 bidirectional connections between regions and self-connections (matrix A), 2) modulatory effects  
523 (i.e., genuine pain and pretended pain) on the between-region connections (matrix B), and 3) driving  
524 inputs (i.e., the video input condition) into the model on both regions (matrix C) (Zeidman et al.,  
525 2019a). To remain parsimonious, we did not set modulatory effects on the self-connections in Matrix

526 A. Then the full DCM model was individually estimated. Finally, group-level DCM inference was  
527 performed using parametric empirical Bayes (Zeidman et al., 2019b). We conducted an automatic  
528 search over the entire model space (max.  $n = 256$ ) using Bayesian model reduction (BMR) and  
529 random-effects Bayesian model averaging (BMA), resulting in a final group model that takes  
530 accuracy, complexity, and uncertainty into account (Zeidman et al., 2019b). The threshold of the  
531 Bayesian posterior probability was set to  $p_p > 0.95$  (i.e., *strong evidence*) but we reported all  
532 parameters above  $p_p > 0.75$  (i.e., *positive evidence*) for full transparency of the DCM results. Finally, a  
533 paired sample *t*-test was performed to compare modulatory effects between the genuine pain and  
534 the pretended pain conditions.

535 To probe whether task-related modulatory effects were associated with behavioral measurements,  
536 we performed stepwise linear regression analyses of modulatory parameters with, 1) the three  
537 behavioral ratings, and 2) the empathy-related questionnaires (i.e., IRI, ECQ, and TAS). We set up  
538 two regression models for the genuine pain condition and the pretended pain condition,  
539 respectively, in which the DCM parameters of modulatory effects were determined as dependent  
540 variables and the ratings of painful expressions in others, painful feelings in others, and  
541 unpleasantness in self as independent variables. Accordingly, we performed additional two  
542 regression models for both conditions in which DCM modulatory effects were set as dependent  
543 variables and scores of each subscale of all questionnaires were set as independent variables,  
544 respectively. As two participants did not complete all three questionnaires, we excluded their data  
545 from the regression analyses. The statistical significance of the regression analysis was set to  $p <$   
546  $0.05$ . The multicollinearity for independent variables was diagnosed using the variance inflation  
547 factor (VIF) that measures the correlation among independent variables, in the R package *car*  
548 (<https://cran.r-project.org/web/packages/car/index.html>). Here we used a rather conservative  
549 threshold of  $VIF < 5$  as a sign of no severe multicollinearity (Menard, 2002; James et al., 2013).

550 **Acknowledgements**

551 This work was supported by Chinese Scholarship Council (CSC) Grant (201604910515) and Vienna  
552 Doctoral School in Cognition, Behavior and Neuroscience (VDS CoBeNe) completion grant fellowship  
553 to Y.Z.; the Vienna Science and Technology Fund (WWTF VRG13-007) to C.L., and the Austrian  
554 Science Fund (FWF P 32686) to C.L. and M.R.. We thank Michael Schnödt, Lukas Repnik, Elisa  
555 Warmuth, Betty Geidel, Phan Ri, Sven Sander, Gvantsa Gogisvanidze, Robert Meyka, and Anja Tritt  
556 for help with data acquisition.

557 **Conflicts of interest**

558 The authors declare no competing financial interests.



559 **References**

- 560 Ashburner, J. (2007). A fast diffeomorphic image registration algorithm. *NeuroImage*, *38*(1), 95-113.  
561 doi: <https://doi.org/10.1016/j.neuroimage.2007.07.007>
- 562 Bach, P., Peelen, M. V., & Tipper, S. P. (2010). On the Role of Object Information in Action  
563 Observation: An fMRI Study. *Cerebral Cortex*, *20*(12), 2798-2809. doi:  
564 <http://doi.org/10.1093/cercor/bhq026>
- 565 Bagby, R. M., Taylor, G. J., & Parker, J. D. A. (1994). The twenty-item Toronto Alexithymia Scale: II.  
566 Convergent, discriminant, and concurrent validity. *Journal of Psychosomatic Research*, *38*(1),  
567 33-40. doi: [http://doi.org/10.1016/0022-3999\(94\)90006-X](http://doi.org/10.1016/0022-3999(94)90006-X)
- 568 Bastos, A. M., Litvak, V., Moran, R., Bosman, C. A., Fries, P., & Friston, K. J. (2015). A DCM study of  
569 spectral asymmetries in feedforward and feedback connections between visual areas V1 and  
570 V4 in the monkey. *NeuroImage*, *108*, 460-475. doi:  
571 <https://doi.org/10.1016/j.neuroimage.2014.12.081>
- 572 Batchelder, L. (2015). *Characterising the components of empathy: implications for models of autism*.  
573 University of Bath.
- 574 Batchelder, L., Brosnan, M., & Ashwin, C. (2017). The Development and Validation of the Empathy  
575 Components Questionnaire (ECQ). *PLOS ONE*, *12*(1), e0169185. doi:  
576 <http://doi.org/10.1371/journal.pone.0169185>
- 577 Batson, C. D., Fultz, J., & Schoenrade, P. A. (1987). Distress and Empathy: Two Qualitatively Distinct  
578 Vicarious Emotions with Different Motivational Consequences. *Journal of Personality*, *55*(1),  
579 19-39. doi: <https://doi.org/10.1111/j.1467-6494.1987.tb00426.x>
- 580 Brett, M., Anton, J.-L., Valabregue, R., & Poline, J.-B. (2002). *Region of interest analysis using an SPM*  
581 *toolbox*. Paper presented at the 8th international conference on functional mapping of the  
582 human brain.
- 583 Bukowski, H., Tik, M., Silani, G., Ruff, C. C., Windischberger, C., & Lamm, C. (2020). When differences  
584 matter: rTMS/fMRI reveals how differences in dispositional empathy translate to distinct

- 585           neural underpinnings of self-other distinction in empathy. *Cortex*, 128, 143-161. doi:
- 586           <https://doi.org/10.1016/j.cortex.2020.03.009>
- 587   Chen, C. C., Henson, R. N., Stephan, K. E., Kilner, J. M., & Friston, K. J. (2009). Forward and backward
- 588           connections in the brain: A DCM study of functional asymmetries. *NeuroImage*, 45(2), 453-
- 589           462. doi: <https://doi.org/10.1016/j.neuroimage.2008.12.041>
- 590   Clark, A. (2013). Whatever next? Predictive brains, situated agents, and the future of cognitive
- 591           science. *Behavioral and Brain Sciences*, 36(3), 181-204. doi:
- 592           <http://doi.org/10.1017/S0140525X12000477>
- 593   Coll, M.-P., Viding, E., Rütgen, M., Silani, G., Lamm, C., Catmur, C., & Bird, G. (2017). Are we really
- 594           measuring empathy? Proposal for a new measurement framework. *Neuroscience &*
- 595           *Biobehavioral Reviews*, 83, 132-139. doi: <https://doi.org/10.1016/j.neubiorev.2017.10.009>
- 596   Davis, M. H. (1980). A multidimensional approach to individual differences in empathy.
- 597   Decety, J., & Lamm, C. (2007). The Role of the Right Temporoparietal Junction in Social Interaction:
- 598           How Low-Level Computational Processes Contribute to Meta-Cognition. *The Neuroscientist*,
- 599           13(6), 580-593. doi: <http://doi.org/10.1177/1073858407304654>
- 600   Decety, J., & Lamm, C. (2011). Empathy versus Personal Distress: Recent Evidence from Social
- 601           Neuroscience. In J. Decety & W. Ickes (Eds.), *The social neuroscience of empathy* (pp. 199 -
- 602           213): MIT Press.
- 603   Fallon, N., Roberts, C., & Stancak, A. (2020). Shared and distinct functional networks for empathy
- 604           and pain processing: A systematic review and meta-analysis of fMRI studies. *Social cognitive*
- 605           *and affective neuroscience*. doi: <https://doi.org/10.1093/scan/nsaa090>
- 606   Fan, Y., Duncan, N. W., de Greck, M., & Northoff, G. (2011). Is there a core neural network in
- 607           empathy? An fMRI based quantitative meta-analysis. *Neuroscience & Biobehavioral Reviews*,
- 608           35(3), 903-911. doi: <https://doi.org/10.1016/j.neubiorev.2010.10.009>

- 609 Faul, F., Erdfelder, E., Lang, A.-G., & Buchner, A. (2007). G\*Power 3: A flexible statistical power  
610 analysis program for the social, behavioral, and biomedical sciences. *Behavior Research*  
611 *Methods*, 39(2), 175-191. doi: <http://doi.org/10.3758/BF03193146>
- 612 Forbes, P. A. G., & Hamilton, A. F. d. C. (2020). Brief Report: Autistic Adults Assign Less Weight to  
613 Affective Cues When Judging Others' Ambiguous Emotional States. *Journal of Autism and*  
614 *Developmental Disorders*, 50(8), 3066-3070. doi: [http://doi.org/10.1007/s10803-020-04410-](http://doi.org/10.1007/s10803-020-04410-w)  
615 [w](http://doi.org/10.1007/s10803-020-04410-w)
- 616 Friston, K. (2010). The free-energy principle: a unified brain theory? *Nature Reviews Neuroscience*,  
617 11(2), 127-138. doi: <http://doi.org/10.1038/nrn2787>
- 618 Gläscher, J., & Gitelman, D. (2008). Contrast weights in flexible factorial design with multiple groups  
619 of subjects. *SPM@ JISCMail. AC. UK) Sml, editor*, 1-12.
- 620 Gola, K. A., Shany-Ur, T., Pressman, P., Sulman, I., Galeana, E., Paulsen, H., Nguyen, L., Wu, T.,  
621 Adhimoolam, B., Poorzand, P., Miller, B. L., & Rankin, K. P. (2017). A neural network  
622 underlying intentional emotional facial expression in neurodegenerative disease.  
623 *NeuroImage: Clinical*, 14, 672-678. doi: <https://doi.org/10.1016/j.nicl.2017.01.016>
- 624 Gorgolewski, K., Burns, C., Madison, C., Clark, D., Halchenko, Y., Waskom, M., & Ghosh, S. (2011).  
625 Nipype: A Flexible, Lightweight and Extensible Neuroimaging Data Processing Framework in  
626 Python. *Frontiers in Neuroinformatics*, 5(13). doi: <http://doi.org/10.3389/fninf.2011.00013>
- 627 Gu, X., & Han, S. (2007). Attention and reality constraints on the neural processes of empathy for  
628 pain. *NeuroImage*, 36(1), 256-267. doi: <https://doi.org/10.1016/j.neuroimage.2007.02.025>
- 629 Hawco, C., Kovacevic, N., Malhotra, A. K., Buchanan, R. W., Viviano, J. D., Iacoboni, M., McIntosh, A.  
630 R., & Voineskos, A. N. (2017). Neural Activity while Imitating Emotional Faces is Related to  
631 Both Lower and Higher-Level Social Cognitive Performance. *Scientific Reports*, 7(1), 1244.  
632 doi: <http://doi.org/10.1038/s41598-017-01316-z>

- 633 Hein, G., & Singer, T. (2008). I feel how you feel but not always: the empathic brain and its  
634 modulation. *Current Opinion in Neurobiology*, *18*(2), 153-158. doi:  
635 <https://doi.org/10.1016/j.conb.2008.07.012>
- 636 Hoffmann, F., Koehne, S., Steinbeis, N., Dziobek, I., & Singer, T. (2016). Preserved Self-other  
637 Distinction During Empathy in Autism is Linked to Network Integrity of Right Supramarginal  
638 Gyrus. *Journal of Autism and Developmental Disorders*, *46*(2), 637-648. doi:  
639 <http://doi.org/10.1007/s10803-015-2609-0>
- 640 Holmes, E., Zeidman, P., Friston, K. J., & Griffiths, T. D. (2020). Difficulties with Speech-in-Noise  
641 Perception Related to Fundamental Grouping Processes in Auditory Cortex. *Cerebral Cortex*,  
642 *31*(3), 1582-1596. doi: <http://doi.org/10.1093/cercor/bhaa311>
- 643 James, G., Witten, D., Hastie, T., & Tibshirani, R. (2013). *An introduction to statistical learning* (Vol.  
644 112): Springer.
- 645 Jauniaux, J., Khatibi, A., Rainville, P., & Jackson, P. L. (2019). A meta-analysis of neuroimaging studies  
646 on pain empathy: investigating the role of visual information and observers' perspective.  
647 *Social cognitive and affective neuroscience*, *14*(8), 789-813. doi:  
648 <https://doi.org/10.1093/scan/nsz055>
- 649 Kanske, P., Böckler, A., Trautwein, F.-M., Parianen Lesemann, F. H., & Singer, T. (2016). Are strong  
650 empathizers better mentalizers? Evidence for independence and interaction between the  
651 routes of social cognition. *Social cognitive and affective neuroscience*, *11*(9), 1383-1392. doi:  
652 <http://doi.org/10.1093/scan/nsw052>
- 653 Lamm, C., Bukowski, H., & Silani, G. (2016). From shared to distinct self-other representations in  
654 empathy: evidence from neurotypical function and socio-cognitive disorders. *Philosophical  
655 transactions of the Royal Society of London. Series B, Biological sciences*, *371*(1686),  
656 20150083. doi: <http://doi.org/10.1098/rstb.2015.0083>

- 657 Lamm, C., Decety, J., & Singer, T. (2011). Meta-analytic evidence for common and distinct neural  
658 networks associated with directly experienced pain and empathy for pain. *NeuroImage*,  
659 54(3), 2492-2502. doi: <https://doi.org/10.1016/j.neuroimage.2010.10.014>
- 660 Lamm, C., Meltzoff, A. N., & Decety, J. (2010). How do we empathize with someone who is not like  
661 us? A functional magnetic resonance imaging study. *J. Cognitive Neuroscience*, 22(2), 362–  
662 376. doi: <http://doi.org/10.1162/jocn.2009.21186>
- 663 Lamm, C., Rütgen, M., & Wagner, I. C. (2019). Imaging empathy and prosocial emotions.  
664 *Neuroscience Letters*, 693, 49-53. doi: <https://doi.org/10.1016/j.neulet.2017.06.054>
- 665 Mars, R. B., Sallet, J., Schüffegen, U., Jbabdi, S., Toni, I., & Rushworth, M. F. S. (2011). Connectivity-  
666 Based Subdivisions of the Human Right “Temporoparietal Junction Area”: Evidence for  
667 Different Areas Participating in Different Cortical Networks. *Cerebral Cortex*, 22(8), 1894-  
668 1903. doi: <http://doi.org/10.1093/cercor/bhr268>
- 669 Menard, S. (2002). *Applied logistic regression analysis* (Vol. 106): Sage.
- 670 Miska, N. J., Richter, L. M. A., Cary, B. A., Gjorgjieva, J., & Turrigiano, G. G. (2018). Sensory experience  
671 inversely regulates feedforward and feedback excitation-inhibition ratio in rodent visual  
672 cortex. *eLife*, 7, e38846. doi: <http://doi.org/10.7554/eLife.38846>
- 673 Pokorny, J. J., Hatt, N. V., Colombi, C., Vivanti, G., Rogers, S. J., & Rivera, S. M. (2015). The Action  
674 Observation System when Observing Hand Actions in Autism and Typical Development.  
675 *Autism Research*, 8(3), 284-296. doi: <https://doi.org/10.1002/aur.1445>
- 676 Power, J. D., Barnes, K. A., Snyder, A. Z., Schlaggar, B. L., & Petersen, S. E. (2012). Spurious but  
677 systematic correlations in functional connectivity MRI networks arise from subject motion.  
678 *NeuroImage*, 59(3), 2142-2154. doi: <https://doi.org/10.1016/j.neuroimage.2011.10.018>
- 679 Power, J. D., Mitra, A., Laumann, T. O., Snyder, A. Z., Schlaggar, B. L., & Petersen, S. E. (2014).  
680 Methods to detect, characterize, and remove motion artifact in resting state fMRI.  
681 *NeuroImage*, 84, 320-341. doi: <https://doi.org/10.1016/j.neuroimage.2013.08.048>

- 682 Rütgen, M., Seidel, E. M., Silani, G., Riechansky, I., Hummer, A., Windischberger, C., Petrovic, P., &  
683 Lamm, C. (2015). Placebo analgesia and its opioidergic regulation suggest that empathy for  
684 pain is grounded in self pain. *Proceedings of the National Academy of Sciences*, *112*(41),  
685 E5638-E5646. doi: <https://doi.org/10.1073/pnas.1511269112>
- 686 Seth, A. K. (2013). Interoceptive inference, emotion, and the embodied self. *Trends in Cognitive*  
687 *Sciences*, *17*(11), 565-573. doi: <https://doi.org/10.1016/j.tics.2013.09.007>
- 688 Silani, G., Lamm, C., Ruff, C. C., & Singer, T. (2013). Right Supramarginal Gyrus Is Crucial to Overcome  
689 Emotional Egocentricity Bias in Social Judgments. *The Journal of Neuroscience*, *33*(39),  
690 15466-15476. doi: <http://doi.org/10.1523/jneurosci.1488-13.2013>
- 691 Sladky, R., Friston, K. J., Tröstl, J., Cunnington, R., Moser, E., & Windischberger, C. (2011). Slice-timing  
692 effects and their correction in functional MRI. *NeuroImage*, *58*(2), 588-594. doi:  
693 <https://doi.org/10.1016/j.neuroimage.2011.06.078>
- 694 Steinbeis, N., Bernhardt, B. C., & Singer, T. (2015). Age-related differences in function and structure  
695 of rSMG and reduced functional connectivity with DLPFC explains heightened emotional  
696 egocentricity bias in childhood. *Social cognitive and affective neuroscience*, *10*(2), 302-310.  
697 doi: <https://doi.org/10.1093/scan/nsu057>
- 698 Stephan, K. E., & Friston, K. J. (2010). Analyzing effective connectivity with functional magnetic  
699 resonance imaging. *WIREs Cognitive Science*, *1*(3), 446-459. doi:  
700 <https://doi.org/10.1002/wcs.58>
- 701 Xiong, R.-C., Fu, X., Wu, L.-Z., Zhang, C.-H., Wu, H.-X., Shi, Y., & Wu, W. (2019). Brain pathways of  
702 pain empathy activated by pained facial expressions: a meta-analysis of fMRI using the  
703 activation likelihood estimation method. *Neural regeneration research*, *14*(1), 172-178. doi:  
704 <http://doi.org/10.4103/1673-5374.243722>
- 705 Zaki, J., Wager, T. D., Singer, T., Keysers, C., & Gazzola, V. (2016). The Anatomy of Suffering:  
706 Understanding the Relationship between Nociceptive and Empathic Pain. *Trends in Cognitive*  
707 *Sciences*, *20*(4), 249-259. doi: <https://doi.org/10.1016/j.tics.2016.02.003>

- 708 Zeidman, P., Jafarian, A., Corbin, N., Seghier, M. L., Razi, A., Price, C. J., & Friston, K. J. (2019a). A  
709 guide to group effective connectivity analysis, part 1: First level analysis with DCM for fMRI.  
710 *NeuroImage*, 200, 174-190. doi: <https://doi.org/10.1016/j.neuroimage.2019.06.031>
- 711 Zeidman, P., Jafarian, A., Seghier, M. L., Litvak, V., Cagnan, H., Price, C. J., & Friston, K. J. (2019b). A  
712 guide to group effective connectivity analysis, part 2: Second level analysis with PEB.  
713 *NeuroImage*, 200, 12-25. doi: <https://doi.org/10.1016/j.neuroimage.2019.06.032>
- 714 Zhang, M., Chung, S. H., Fang-Yen, C., Craig, C., Kerr, R. A., Suzuki, H., Samuel, A. D. T., Mazur, E., &  
715 Schafer, W. R. (2008). A Self-Regulating Feed-Forward Circuit Controlling *C. elegans* Egg-  
716 Laying Behavior. *Current Biology*, 18(19), 1445-1455. doi:  
717 <https://doi.org/10.1016/j.cub.2008.08.047>
- 718 Zhao, Y., Rütgen, M., Zhang, L., & Lamm, C. (2021). Pharmacological fMRI provides evidence for  
719 opioidergic modulation of discrimination of facial pain expressions. *Psychophysiology*, 58(2),  
720 e13717. doi: <https://doi.org/10.1111/psyp.13717>
- 721 Zhou, F., Li, J., Zhao, W., Xu, L., Zheng, X., Fu, M., Yao, S., Kendrick, K. M., Wager, T. D., & Becker, B.  
722 (2020). Empathic pain evoked by sensory and emotional-communicative cues share common  
723 and process-specific neural representations. *eLife*, 9, e56929. doi:  
724 <http://doi.org/10.7554/eLife.56929>
- 725
- 726

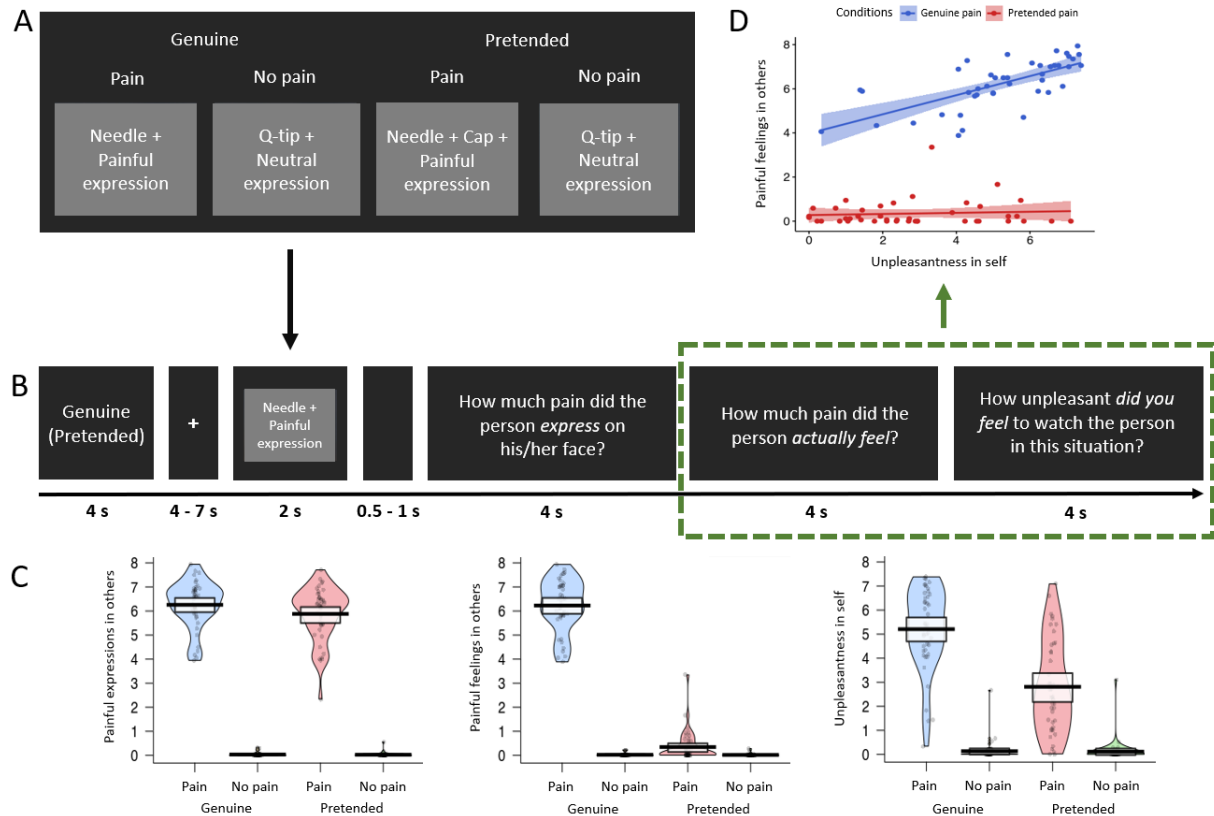

727 **Figure 1. fMRI experimental design and behavioral results.** (A) Overview of the experimental design  
 728 with the four conditions genuine vs. pretended, pain vs. no pain. Examples show static images, while  
 729 in the experiment participants were shown video clips. (B) Overview of experimental timeline. At the  
 730 outset of each block, a reminder of “genuine” or “pretended” was shown (both terms are shown  
 731 here for illustrative purposes, in the experiment either genuine or pretended was displayed). After a  
 732 fixation cross, a video in the corresponding condition appeared on the screen. Followed by a short  
 733 jitter, three questions about the video were separately presented and had to be rated on a visual  
 734 analogue scale. These would then be followed by the next video clip and questions (not shown). (C)  
 735 Violin plots of the three types of ratings for all conditions. Participants generally demonstrated  
 736 higher ratings for painful expressions in others, painful feelings in others, and unpleasantness in self  
 737 in the genuine pain condition than in the pretended pain condition. Ratings of all three questions  
 738 were higher in the painful situation than in the neutral situation, regardless of whether in the  
 739 genuine or pretended condition. The thick black lines illustrate mean values, and the white boxes  
 740 indicate a 95% CI. The dots are individual data, and the “violin” outlines illustrate their estimated



741 density at different points of the scale. (D) Correlations of painful feelings in others and  
742 unpleasantness in self for the genuine pain and the pretended pain (the relevant questions were  
743 highlighted with a green rectangular). Results revealed a significant Pearson correlation between the  
744 two questions in the genuine pain condition, but no correlation in the pretended pain condition. The  
745 lines represent the fitted regression lines, bands indicate a 95% CI.

746

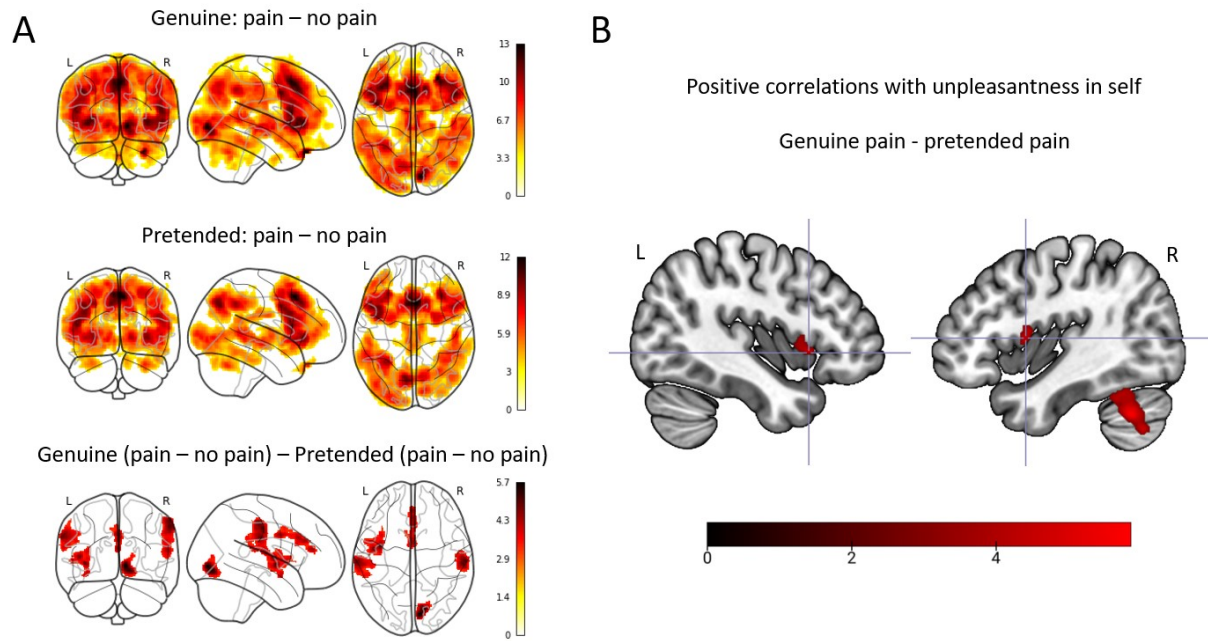

747

748 **Figure 2. Neuroimaging results: Mass-univariate analyses.** (A) Activation maps of genuine: pain – no

749 pain (top), pretended: pain - no pain (middle), and genuine (pain – no pain) – pretended (pain – no

750 pain) (bottom). As expected, we found brain activations in the bilateral alns, aMCC, and rSMG in all

751 three contrasts (except for the bottom contrast, where the right alns is only close to the significance

752 threshold). (B) The multiple regression analysis demonstrated significant clusters in the left (peak: [-

753 42, 15, -2]) and right anterior insular cortex (peak: [45, 5, 8]) for the ratings of unpleasantness in self.

754 All activations are thresholded with cluster-level FWE correction,  $p < 0.05$  ( $p < 0.001$  uncorrected

755 initial selection threshold).

756

757

758

759

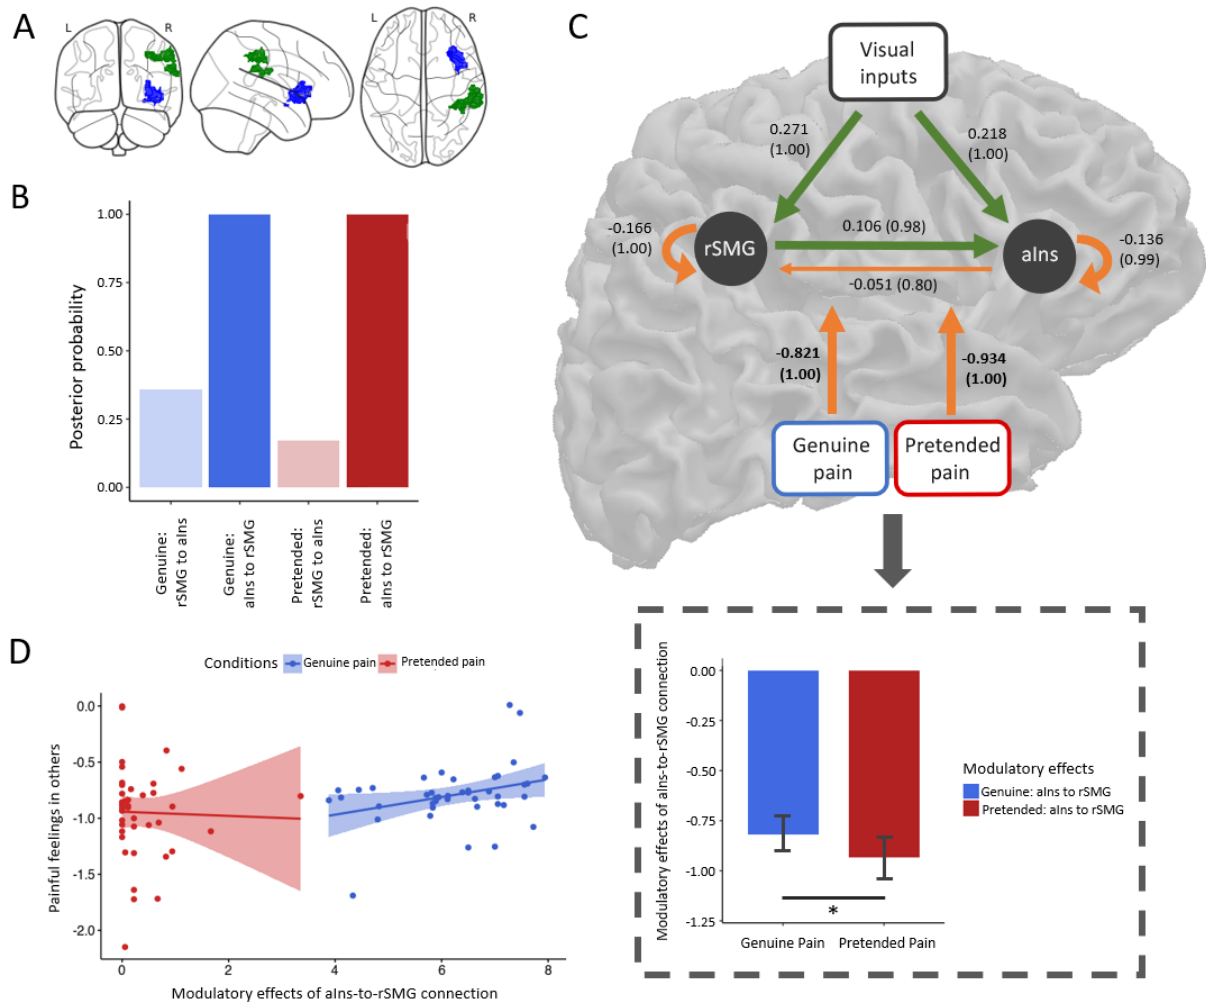

760

761 **Figure 3. DCM results and brain-behavior analyses.** (A) ROIs included in the DCM: aIns (blue; peak:  
 762 [33, 29, 2]) and rSMG (green; peak: [41, -39, 42]). (B) Posterior probability of modulatory effects for  
 763 the genuine pain and the pretended pain. (C) The group-average DCM model. Green arrows indicate  
 764 neural excitation, and orange arrows indicate neural inhibition. Importantly, we found strong  
 765 evidence of inhibitory effects on the connection of aIns to rSMG for both the genuine pain condition  
 766 and the pretended pain condition. Values without the bracket quantify the strength of connections  
 767 and values in the bracket indicate the posterior probability of connections. All DCM parameters of  
 768 the optimal model showed greater than a 95% posterior probability (i.e., strong evidence) except for  
 769 the intrinsic connection of aIns to rSMG ( $p_p = 0.80$ ). Paired sample t-test showed less inhibitory  
 770 effects of the aIns-to-rSMG connection for the genuine pain than the pretended pain. This result is

771 highlighted with a grey rectangular. Data are mean  $\pm$  95% CI. (D) The stepwise linear regression  
772 model revealed a positive correlation between the inhibitory effect and painful feelings in others  
773 (after accounting for the other two ratings) for genuine pain but no correlation for pretended pain.  
774

775 **Table 1.** Results of mass-univariate functional segregation analyses in the MNI space. Region names  
 776 were labeled with the AAL atlas, threshold  $p < 0.05$  cluster-wise FWE correction (initial selection  
 777 threshold  $p < 0.001$ , uncorrected). BA = Brodmann area, L = left hemisphere, R = right hemisphere.

778

| Region label                     | BA | Cluster size | x   | y   | z   | t-value |
|----------------------------------|----|--------------|-----|-----|-----|---------|
| <b>Genuine: pain - no pain</b>   |    |              |     |     |     |         |
| Lingual_R                        | 18 | 183732       | 11  | -84 | -3  | 13.38   |
| Temporal_Pole_Sup_R              | 38 |              | 30  | 33  | -33 | 13.31   |
| Supp_Motor_Area_R                | 8  |              | 5   | 15  | 51  | 12.96   |
| Supp_Motor_Area_R                | 8  |              | 3   | 17  | 50  | 12.92   |
| Supp_Motor_Area_L                | 8  |              | -5  | 17  | 48  | 12.56   |
| Insula_L                         | 45 |              | -32 | 26  | 6   | 12.32   |
| Insula_R                         | 45 |              | 33  | 29  | 3   | 12.09   |
| Frontal_Inf_Oper_R               | 44 |              | 51  | 14  | 15  | 12.01   |
| Frontal_Inf_Oper_R               | 44 |              | 50  | 12  | 18  | 11.79   |
| Precentral_L                     | 6  |              | -42 | 3   | 39  | 11.72   |
| Fusiform_R                       | 20 | 463          | 36  | -5  | -41 | 5.58    |
| <b>Pretended: pain - no pain</b> |    |              |     |     |     |         |
| Supp_Motor_Area_R                | 8  | 59665        | 5   | 20  | 48  | 11.80   |
| Supp_Motor_Area_L                | 8  |              | -6  | 18  | 50  | 11.14   |
| Frontal_Inf_Oper_L               | 44 |              | -50 | 15  | 15  | 10.39   |
| Insula_R                         | 45 |              | 33  | 29  | 0   | 9.81    |
| Insula_L                         | 45 |              | -29 | 30  | 0   | 9.60    |
| Frontal_Inf_Tri_R                | 44 |              | 47  | 15  | 26  | 9.21    |
| Precuneus_L                      | 7  | 35136        | -9  | -71 | 41  | 10.27   |
| Parietal_Inf_L                   | 39 |              | -32 | -51 | 41  | 9.39    |
| Precuneus_R                      | 7  |              | 9   | -69 | 38  | 8.44    |
| Temporal_Mid_L                   | 21 |              | -53 | -47 | 5   | 7.67    |
| Occipital_Mid_L                  | 19 |              | -44 | -78 | 2   | 7.47    |
| Parietal_Inf_R                   | 39 |              | 39  | -50 | 41  | 7.25    |
| Temporal_Mid_R                   | 22 | 12970        | 51  | -20 | -6  | 7.70    |
| Lingual_R                        | 17 |              | 12  | -86 | -2  | 7.40    |
| Fusiform_R                       | 37 |              | 47  | -33 | -27 | 5.32    |
| Occipital_Mid_R                  | 18 |              | 33  | -86 | 3   | 5.23    |
| Cingulum_Mid_R                   | 23 | 1666         | -3  | -14 | 27  | 6.35    |
| Cingulum_Mid_L                   | 23 |              | -3  | -24 | 32  | 5.57    |

|                                                                  |    |      |     |     |     |      |
|------------------------------------------------------------------|----|------|-----|-----|-----|------|
| Temporal_Pole_Sup_R                                              | 47 | 589  | 32  | 35  | -33 | 7.18 |
| Frontal_Sup_Orb_R                                                | 11 |      | 17  | 41  | -24 | 3.36 |
| <b>Genuine (pain – no pain) –<br/>pretended (pain – no pain)</b> | 19 | 18   | 24  | -81 | 39  | 5.27 |
| SupraMarginal_L                                                  | 40 | 1877 | -66 | -21 | 32  | 4.94 |
| Postcentral_L                                                    | 1  |      | -50 | -21 | 26  | 3.75 |
| SupraMarginal_R                                                  | 40 | 1833 | 63  | -20 | 42  | 5.09 |
| Rolandic_Oper_R                                                  | 40 |      | 59  | -15 | 14  | 4.47 |
| Insula_L                                                         | 13 | 1299 | -38 | -3  | -2  | 5.01 |
| Rolandic_Oper_L                                                  | 4  |      | -45 | -6  | 8   | 4.8  |
| Cingulum_Ant_L                                                   | 32 | 1138 | 0   | 41  | 17  | 4.54 |
| Cingulum_Mid_R                                                   | 32 |      | 2   | 24  | 32  | 4.45 |
| Cingulum_Mid_L                                                   | 24 |      | 0   | 2   | 35  | 4.43 |
| Cingulum_Ant_R                                                   | 8  |      | 2   | 32  | 27  | 4.42 |
| Lingual_R                                                        | 18 | 1003 | 9   | -84 | -3  | 5.72 |
| Calcarine_R                                                      | 17 |      | 18  | -78 | 8   | 3.61 |
| Insula_R                                                         | 13 | 225  | 39  | 8   | -3  | 3.91 |
| Rolandic_Oper_R                                                  | 13 |      | 41  | 0   | 11  | 3.77 |

779

780
